# Supplementary material
Source: HighWire-hosted journal article supplement (https://bmjpaedsopen.bmj.com/content/3/1/e000515)
Supplement: inline-supplementary-material-2 [file inline-supplementary-material-2.pdf]

## BUDS Parent Interview Question Guide

v1.1/230418/IRAS ID:232205

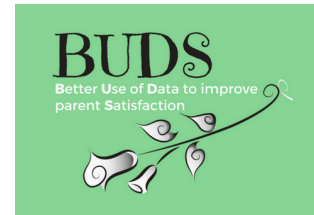

**Title of Project:** Better Use of Data to improve parent Satisfaction (BUDS)

### Project aims to explore:

- Parent experience of receiving information updates about their baby in neonatal care
  - Parent experience of feeling involved in their baby's care
- 

### 1. Introduction (~5 min)

- Introduce self
  - Explain nature and purpose of project
  - Who research is for
- Talk through key points:
  - Interview length 15-30 minutes
  - Interview like a discussion, although specific topics to cover
  - No right or wrong answers
  - Participation is voluntary and right to withdraw
- Introduce audio recorder (so can actively listen to parent and for accuracy)
- Stress confidentiality and anonymity, secure transfer and storage of data , how Findings will be reported
- Check for parent understanding of information sheet and check consent form signed
- Any questions they may have

### 2. Background (~5 min)

- Check Parent Demographic Form completed
- Their baby's sex, gestation at birth, current age, length of stay on unit, other children (ages), marital status, occupation

### 3. Experience of receiving information updates in neonatal care (~10-15min)

*Aim to obtain an overview of how parents are given information about their baby in neonatal care*

- How informed do they feel about their baby every day
- What type of information are they given about their baby, where in the unit and when during their baby's admission
- In what way are they given information (eg verbal, written, phone), what do they prefer
- Who gives them information (eg doctors, nurses)
- How do they feel about the way information is communicated to them
- How often do they request face-to- face updates from staff / how satisfied are they with them / why
- How often do they phone the unit for updates / how satisfied are they with telephone updates/ why

**4. Experience of feeling involved in their baby's care (~5-10min)**

- How involved do they feel in their baby's care /why / why not
- How sufficient do they feel the information provided about care involvement is

**5. Close**

- Reassure them about confidentiality and anonymity
- Ask if they would like to be informed of the outcomes of the research (take email address if that is their preferred way of being informed)
