# Supplementary material
Source: HighWire-hosted journal article supplement (https://bmjpaedsopen.bmj.com/content/3/1/e000515)
Supplement: inline-supplementary-material-3 [file inline-supplementary-material-3.pdf]

## BUDS Staff Interview Question Guide

v1.1/230418/IRAS ID:232205

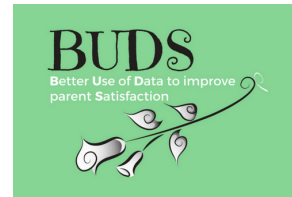

**Title of Project:** Better Use of Data to improve parent Satisfaction (BUDS)

### Project aims to explore:

- Neonatal staff experience of giving parents information updates about their baby in neonatal care
  - Neonatal staff perceptions of how updating parents affects their workload
- 

### 1. Introduction (2 min)

- Introduce self
  - Explain nature and purpose of project
  - Who research is for
- Talk through key points:
  - Interview length 10 minutes
  - Interview like a discussion, although specific topics to cover
  - No right or wrong answers
  - Participation is voluntary and right to withdraw
- Introduce audio recorder (so can actively listen to staff member and for accuracy)
- Stress confidentiality and anonymity, secure transfer and storage of data , how findings will be reported
- Check for understanding of information sheet and check consent form signed
- Any questions they may have

### 2. Background (1 min)

- Job role, grade, length of time worked on the unit

### 3. Experience of giving parents information updates about their baby in neonatal care (5 min)

- How do they give parents information about their baby on the neonatal unit (eg verbal, written, phone)
- Do they volunteer information to parents or do parents ask for it
- How often do they offer face-to-face updates to parents / how often do parents ask for them
- How often do they update parents over the phone

### 4. Neonatal staff perceptions of how updating parents affects their workload (5 min)

- How much of their job role / regular shift pattern involves updating parents
- How does updating parents impact on their other clinical duties

### 5. Close

- Reassure them about confidentiality and anonymity
